# Supplementary material
Source: PubMed Central journal article supplement (PMC7613938)
Supplement: EMS151277-supplement-Supplementary_Table_1.pdf [file EMS151277-supplement-Supplementary_Table_1.pdf]

# Do adolescents' experiences of the barriers to and facilitators of physical activity differ by socioeconomic position? A systematic review of qualitative evidence

Miss Olivia Alliot<sup>1</sup>, Miss Mairead Ryan<sup>1</sup>, Dr. Hannah Fairbrother<sup>2</sup>, Dr. Esther van Sluijs<sup>1</sup>

1. *UKCRC Centre for Diet and Activity Research (CEDAR), MRC Epidemiology Unit, University of Cambridge, Cambridge, United Kingdom*
2. *Health Sciences School, University of Sheffield, Sheffield, United Kingdom*

## **Correspondence**

MRC Epidemiology Unit,

University of Cambridge School of Clinical Medicine,

Box 285 Institute of Metabolic Science,

Cambridge Biomedical Campus,

Cambridge CB2 0QQ

Email: [esther.vansluijs@mrc-epid.cam.ac.uk](mailto:esther.vansluijs@mrc-epid.cam.ac.uk)

**Table S1:** A table documenting how prevalent codes were developed into descriptive and then analytical themes

| <b>Analytical themes</b>                   | <b>Descriptive themes (prevalent codes)</b>                                                                                                                                                                                                                                                                                                                                                                                                                                                                   |
|--------------------------------------------|---------------------------------------------------------------------------------------------------------------------------------------------------------------------------------------------------------------------------------------------------------------------------------------------------------------------------------------------------------------------------------------------------------------------------------------------------------------------------------------------------------------|
| <b>Low-SEP</b>                             |                                                                                                                                                                                                                                                                                                                                                                                                                                                                                                               |
| Support for physical activity              | <p><i>Barriers</i></p> <ul style="list-style-type: none"> <li>-Parental support (financial, transportation, prioritisation/value, family structure)</li> </ul> <p><i>Facilitators</i></p> <ul style="list-style-type: none"> <li>-Parental support (encouragement, family structure)</li> <li>-Peer support (companionship, enjoyment, practical support)</li> <li>- Teachers and coach support (encouragement, information, opportunities)</li> </ul>                                                        |
| Accessibility and the environment          | <p><i>Barriers</i></p> <ul style="list-style-type: none"> <li>-Local public transport (anxiety, unsafe, crime, unreliable, poorly connected)</li> <li>-Local facilities (proximity, quality, vandalism, litter)</li> <li>-Local environment (crime, loose animals, traffic, other residents)</li> <li>-School environment (facilities, opportunities)</li> </ul> <p><i>Facilitators</i></p> <ul style="list-style-type: none"> <li>-Local facilities (community centers, free/low cost activities)</li> </ul> |
| Experiences of health and other behaviours | <p><i>Barriers</i></p> <ul style="list-style-type: none"> <li>-Benefits of physical activity (understanding of physical activity)</li> </ul> <p><i>Facilitators</i></p> <ul style="list-style-type: none"> <li>-Benefits of physical activity (understanding of physical activity, physical health, mental health, environmental)</li> </ul>                                                                                                                                                                  |
| Gendered experiences                       | <p><i>Barriers</i></p> <ul style="list-style-type: none"> <li>-Female (appearance, body image, self conscious, self-esteem, anxiety, parental attitudes, stereotyping, opportunities/provision, support)</li> </ul> <p><i>Facilitators</i></p> <ul style="list-style-type: none"> <li>-Male (skill based activities, mixed-gender activities)</li> <li>-Female (same gender environment)</li> </ul>                                                                                                           |
| <b>Middle-SEP</b>                          |                                                                                                                                                                                                                                                                                                                                                                                                                                                                                                               |
| Support for physical activity              | <p><i>Barriers</i></p> <ul style="list-style-type: none"> <li>-Parental support (car use)</li> </ul>                                                                                                                                                                                                                                                                                                                                                                                                          |

|                                            |                                                                                                                                                                                                                                                                                                                                                                                  |
|--------------------------------------------|----------------------------------------------------------------------------------------------------------------------------------------------------------------------------------------------------------------------------------------------------------------------------------------------------------------------------------------------------------------------------------|
|                                            | <p><i>Facilitators</i></p> <ul style="list-style-type: none"> <li>-Parental support (financial)</li> <li>-Peer support (companionship, fun)</li> </ul>                                                                                                                                                                                                                           |
| Accessibility and the environment          | <p><i>Barriers</i></p> <ul style="list-style-type: none"> <li>-n/a</li> </ul> <p><i>Facilitators</i></p> <ul style="list-style-type: none"> <li>-Local facilities (proximity, quality)</li> <li>-Local environment (safety, freedom, countryside)</li> </ul>                                                                                                                     |
| Experiences of health and other behaviours | <p><i>Barriers</i></p> <ul style="list-style-type: none"> <li>-Other behaviours (social demands, friendship groups, competing priorities)</li> </ul> <p><i>Facilitators</i></p> <ul style="list-style-type: none"> <li>-n/a</li> </ul>                                                                                                                                           |
| Gendered experiences                       | <p><i>Barriers</i></p> <ul style="list-style-type: none"> <li>-Inactive male (competition, high-intensity)</li> <li>-Inactive female (team competition, pressure to win)</li> </ul> <p><i>Facilitators</i></p> <ul style="list-style-type: none"> <li>-n/a</li> </ul>                                                                                                            |
| <b>High-SEP</b>                            |                                                                                                                                                                                                                                                                                                                                                                                  |
| Support for physical activity              | <p><i>Barriers</i></p> <ul style="list-style-type: none"> <li>-Parental support (opt out, academic success)</li> <li>-Peer support (opt out, companionship)</li> </ul> <p><i>Facilitators</i></p> <ul style="list-style-type: none"> <li>-Parental support (financial, companionship, opportunities, transport, encouragement)</li> <li>-Peer support (companionship)</li> </ul> |
| Accessibility and the environment          | <p><i>Barriers</i></p> <ul style="list-style-type: none"> <li>-n/a</li> </ul> <p><i>Facilitators</i></p>                                                                                                                                                                                                                                                                         |

|                                            |                                                                                                                                                                                                                                                  |
|--------------------------------------------|--------------------------------------------------------------------------------------------------------------------------------------------------------------------------------------------------------------------------------------------------|
|                                            | <ul style="list-style-type: none"> <li>-School provision (opportunities/trips, clubs/activities, facilities)</li> <li>-Local facilities (proximity, quality)</li> <li>-Local environment (countryside)</li> </ul>                                |
| Experiences of health and other behaviours | <p><i>Barriers</i></p> <ul style="list-style-type: none"> <li>-Other behaviours (academic, extra-curricular, sleep, physical activity as a barrier)</li> </ul> <p><i>Facilitators</i></p> <ul style="list-style-type: none"> <li>-n/a</li> </ul> |
| Gendered experiences                       | <p><i>Barriers</i></p> <ul style="list-style-type: none"> <li>-Female (male peers, male staff)</li> </ul> <p><i>Facilitators</i></p> <ul style="list-style-type: none"> <li>-Female (same gender environment)</li> </ul>                         |
