# Supplementary material
Source: PubMed Central journal article supplement (PMC7613938)
Supplement: EMS151277-supplement-Supporting_information.pdf [file EMS151277-supplement-Supporting_information.pdf]

# Do adolescents' experiences of the barriers and facilitators of physical activity differ by socioeconomic position? A systematic review of qualitative evidence

Miss Olivia Allcott<sup>1</sup>, Miss Mairead Ryan<sup>1</sup>, Dr. Hannah Fairbrother<sup>2</sup>, Dr. Esther van Sluijs<sup>1</sup>

1. *UKCRC Centre for Diet and Activity Research (CEDAR), MRC Epidemiology Unit, University of Cambridge, Cambridge, United Kingdom*
2. *Health Sciences School, University of Sheffield, Sheffield, United Kingdom*

## **Correspondence**

MRC Epidemiology Unit,

University of Cambridge School of Clinical Medicine,

Box 285 Institute of Metabolic Science,

Cambridge Biomedical Campus,

Cambridge CB2 0QQ

Email: [esther.vansluijs@mrc-epid.cam.ac.uk](mailto:esther.vansluijs@mrc-epid.cam.ac.uk)

## Search Strategies

### Box S1: Search strategy for MEDLINE via Ovid

1. Physical activity.mp. or exp Exercise/
2. ("physical\* activ\*" OR exercis\* OR "activ\* transport\*" OR "activ\* travel\*" OR sport\* OR "leisure activ\*" OR "physical education").ti,ab,kw.
3. 1 or 2
4. exp Adolescent/
5. (adolescen\* OR children\* OR youth\* OR teenage\* OR student\* OR pupil\*).ti,ab,kw.
6. 4 or 5
7. exp Socioeconomic Factors/ or exp Social Class/
8. (socioeconomic\* OR "socio economic\*" OR "socio-economic\*" OR "social class" OR "social status" OR affluence OR deprivation OR deprived OR disadvant\* OR demograph\* OR education OR occupation OR income OR wealth\* OR "household condition\*").ti,ab,kw.
9. 7 or 8
10. exp Qualitative Research/ or qualitative.mp.
11. (qualitative OR "focus group\*" OR "focus-group\*" OR interview\* OR narrative\* OR ethnograph\* OR "mixed-method\*" OR "mixed method\*").ti,ab,kw.
12. 10 or 11
13. 3 and 6 and 9 and 12

### Box S2: Search strategy for Web of Science (core collection)

TS=("physical\* activ\*" OR exercis\* OR "activ\* transport\*" OR "activ\* travel\*" OR sport\* OR "leisure activ\*" OR "physical education").

AND

TS=(adolescen\* OR children\* OR youth\* OR teenage\* OR student\* OR pupil\*).

AND

TS=( socioeconomic\* OR "socio economic\*" OR "socio-economic\*" OR "social class" OR "social status" OR affluence OR deprivation OR deprived OR disadvant\* OR demograph\* OR education OR occupation OR income OR wealth OR "household condition\*").

AND

TS=(qualitative OR "focus group\*" OR "focus-group\*" OR interview\* OR narrative\* OR ethnograph\* OR "mixed-method\*" OR "mixed method\*").

**Box S3:** Search strategy for ERIC, PsychINFO and Global Health via EBSCOhost

1. TI (("physical\* activ\* OR exercise\* OR "active transport\*" OR "active\* travel\*" OR sport\*. OR "leisure activ\* OR "physical education".) OR AB (("physical\* activ\* OR exercise\* OR "active transport\*" OR "active\* travel\*" OR sport\*. OR "leisure activ\* OR "physical education".))
2. DE "Physical Activity" OR DE Exercise OR DE "active living\*" OR DE "Activity Level" OR DE "Health Behaviour" OR DE "Physical Fitness"
3. 1 OR 2
4. TI (("adolescen\*" OR children\* OR youth\* OR teenager\* OR Student\* OR Pupil\*.) OR AB (("adolescen\*" OR children\* OR youth\* OR teenager\* OR Student\* OR Pupil\*.)
5. DE "Adolescent Attitudues" OR DE "Adolescent Bhevaiour" OR DE "Adolescent Characterisits" OR "Adolescent Development" OR DE Adolescent Psychology"
6. 4 OR 5
7. TI ((socioeconomic\* OR "socio economic\*" OR socio-economic\* OR "social class" OR "social status" OR affluence OR deprivation OR deprived OR disadvant\* OR demograph\* OR education OR occupation OR income OR wealth OR "household condition\*.) OR AB ((socioeconomic\* OR "socio economic\*" OR socio-economic\* OR "social class" OR "social status" OR affluence OR deprivation OR deprived OR disadvant\* OR demograph\* OR education OR occupation OR income OR wealth OR "household condition\*.)
8. DE "Socioeconomic Status"
9. 7 OR 8
10. TI ((Qualitative OR "focus group\*" OR "focus-group\*" OR interview\* OR narrative\* OR ethnograph\* OR "mixed-method\*").) OR AB ((Qualitative OR "focus group\*" OR "focus-group\*" OR interview\* OR narrative\* OR ethnograph\* OR "mixed-method\*").)
11. DE "Qualitative Measures" AND DE "Qualitative Methods"
12. 10 OR 11
13. 3 AND 6 AND 9 AND 12
